# Supplementary material for: The association between frailty and quality of life among rural community-dwelling older adults in Kegalle district of Sri Lanka: a cross-sectional study
Source: Springer Nature journal article supplement (doi:10.1007/s11136-019-02137-5), 2019-02-27
Supplement: MOESM1 [file 16513646]

**Appendix I.** Distribution of domain specific quality of life scores according to frailty status

**Appendix II.** Unadjusted, ‘age-and sex’-adjusted and multivariable adjusted linear regression models: total OPQOL score

| **Covariate** | | **Model 1** | **Model 2** | **Model 3** | **Model 4** | **Model 5** | **Model 6** | **Model 7** |
| --- | --- | --- | --- | --- | --- | --- | --- | --- |
| **Frailty** | |  |  |  |  |  |  |  |
|  | Robust | 0.0 | 0.0 | 0.0 | 0.0 | 0.0 | 0.0 | 0.0 |
|  | Pre-frail | **-7.4 (-10.0, -4.8)** | **-6.9 (-9.5, -4.4)** | **-6.3 (-8.7, -3.9)** | **-5.3 (-7.9, -2.6)** | **-4.5 (-7.3, -1.8)** | **-3.9 (-6.4, -1.3)** | **-3.7 (-6.4, -1.1)** |
|  | Frail | **-20.3 (-23.4, -16.7)** | **-19.8 (-23.3, -16.3)** | **-18.0 (-21.9, -14.1)** | **-16.0 (-20.0, -12.1)** | **-14.5 (-18.1, -10.9)** | **-12.9 (-16.4, -9.5)** | **-12.7 (-16.3, -9.0)** |
| **Sex** |  |  |  |  |  |  |  |  |
|  | Male | 0.0 | 0.0 | 0.0 | 0.0 | 0.0 | 0.0 |
|  | Female | **-2.6 (-4.8, -0.3)** | -1.3 (-4.2, 1.6) | -0.3 (-3.1, 2.4) | 0.8 (-1.5, 3.1) | 1.1 (-1.2, 3.5) | 1.1 (-1.3, 3.4) |
| **Age category** | |  |  |  |  |  |  |
|  | 60-64 | 0.0 | 0.0 | 0.0 | 0.0 | 0.0 | 0.0 |
|  | 65-69 | -0.1 (-3.5, 3.3) | 0.1 (-3.0, 3.2) | 0.3 (-2.3, 2.9) | 0.5 (-1.9, 3.0) | 0.6 (-2.0, 3.2) | 0.5 (-2.1, 3.2) |
|  | 70-74 | -1.5 (-6.6, 3.6) | -1.6 (-6.3, 3.2) | -1.9 (-6.8, 3.0) | -1.6 (-6.7, 3.4) | -0.9 (-5.7, 3.9) | -0.8 (-5.6, 3.9) |
|  | 75-79 | -2.0 (-5.3, 1.3) | -2.6 (-5.7, 0.5) | -2.3 (-5.5, 0.9) | -1.5 (-4.7, 1.7) | -1.0 (-4.3, 2.4) | -0.8 (-4.2, 2.7) |
|  | ≥80 | 1.7 (-3.1, 6.5) | 1.3 (-3.4, 5.9) | 0.2 (-4.7, 5.1) | 0.7 (-4.0, 5.4) | 3.3 (-1.9, 8.4) | 3.4 (-1.9, 8.8) |
| **Longest-held occupation** | |  |  |  |  |  |  |
|  | Never-employed/skill level 1 | 0.0 | 0.0 | 0.0 | 0.0 | 0.0 |
|  | Skill level 2 | 2.2 (-0.6, 4.9) | 1.8 (-1.0, 4.7) | 1.4 (-1.4, 4.2) | 0.7 (-1.9, 3.3) | 0.7 (-1.9, 3.4) |
|  | Skill level 3/4 | **9.3 (4.8, 13.8)** | **8.8 (4.2, 13.4)** | **7.5 (3.0, 11.9)** | **5.0 (0.9, 9.2)** | **4.7 (0.4, 9.0)** |
| **Social support** | |  |  |  |  |  |
|  | Strong | 0.0 | 0.0 | 0.0 | 0.0 |
|  | Moderate | **-8.7 (-12.2, -5.2)** | **-8.3 (-11.7, -4.9)** | **-8.6 (-12.0, -5.2)** | **-8.4 (-11.7, -5.1)** |
|  | Poor | **-13.9 (-20.3, -7.5)** | **-13.6 (-20.4, 6.9)** | **-13.5 (-20.6, -6.3)** | **-13.1 (-19.9, -6.4)** |
| **Multimorbidity** | |  |  |  |  |
|  | No | 0.0 | 0.0 | 0.0 |
|  | Yes | -1.4 (-3.5, 0.8) | -1.5 (-3.6, 0.6) | -1.4 (-3.6, 0.7) |
| **Chronic pain** | |  |  |  |
|  | No | 0.0 | 0.0 | 0.0 |
|  | Yes | **-5.7 (-8.2, -3.3)** | **-5.4 (-7.9, -2.9)** | **-5.3 (-7.8, -2.8)** |
| **MoCA score** | |  | **0.5 (0.2, 0.8)** | **0.5 (0.2, 0.8)** |
| **Perceived vision ability** | |  |  |
|  | Poor/fair | 0.0 |
|  | Good/very good/excellent | 1.6 (-1.4, 4.7) |
| **Perceived hearing ability** | |  |
|  | Poor/fair | 0.0 |
|  | Good/very good/excellent | 0.1 (-2.3, 2.6) |
|  | |  |
| **R2 (%)** | | 20.3 | 21.5 | 26.3 | 33.6 | 37.0 | 39.1 | 39.3 |

Significant coefficients are displayed in bold.

**Appendix III.** Unadjusted, ‘age-and sex’-adjusted and multivariable adjusted linear regression models: life overall domain

| **Covariate** | | **Model 1** | **Model 2** | **Model 3** | **Model 4** | **Model 5** | **Model 6** | **Model 7** |
| --- | --- | --- | --- | --- | --- | --- | --- | --- |
| **Frailty** | |  |  |  |  |  |  |  |
|  | Robust | 0.0 | 0.0 | 0.0 | 0.0 | 0.0 | 0.0 | 0.0 |
|  | Pre-frail | **-0.9 (-1.5, -0.4)** | **-0.9 (-1.4, -0.4)** | **-0.8 (-1.3, -0.3)** | **-0.6 (-1.0, -0.1)** | **-0.5 (-1.0, -0.0)** | -0.5 (-1.0, 0.0) | -0.4 (-1.0, 0.1) |
|  | Frail | **-2.3 (-3.1, -1.5)** | **-2.3 (-3.0, -1.6)** | **-2.1 (-2.8, -1.3)** | **-1.6 (-2.4, -0.9)** | **-1.5 (-2.3, -0.7)** | **-1.4 (-2.2, -0.6)** | **-1.4 (-2.1, -0.6)** |
| **Sex** |  |  |  |  |  |  |  |  |
|  | Male | 0.0 | 0.0 | 0.0 | 0.0 | 0.0 | 0.0 |
|  | Female | -0.5 (-1.1, 0.0) | -0.4 (-1.1, 0.2) | -0.3 (-0.9, 0.4) | -0.2 (-0.8, 0.4) | -0.1 (-0.8, 0.5) | 0.1 (-0.8, 0.5) |
| **Age category** | |  |  |  |  |  |  |
|  | 60-64 | 0.0 | 0.0 | 0.0 | 0.0 | 0.0 | 0.0 |
|  | 65-69 | -0.1 (-0.8, 0.5) | -0.1 (-0.7, 0.5) | -0.1 (-0.6, 0.5) | -0.1 (-0.6, 0.5) | -0.1 (-0.6, 0.5) | -0.1 (-0.6, 0.5) |
|  | 70-74 | -0.1 (-1.1, 1.0) | -0.1 (-1.1, 0.9) | -0.1 (-1.1, 0.9) | -0.1 (-1.2, 0.9) | -0.1 (-1.1, 0.9) | -0.1 (-1.0, 0.9) |
|  | 75-79 | -0.4 (-1.2, 0.4) | -0.4 (-1.2, 0.3) | -0.4 (-1.2, 0.3) | -0.4 (-1.1, 0.4) | -0.3 (-1.1, 0.4) | -0.3 (-1.0, 0.5) |
|  | ≥80 | 0.2 (-0.6, 1.1) | 0.2 (-0.6, 1.0) | -0.1 (-0.9, 0.7) | -0.1(0.9, 0.8) | 0.1 (-1.0, 1.1) | 0.2 (-0.9, 1.2) |
| **Longest-held occupation** | |  |  |  |  |  |  |
|  | Never-employed/skill level 1 | 0.0 | 0.0 | 0.0 | 0.0 | 0.0 |
|  | Skill level 2 | 0.1 (-0.7, 0.9) | 0.1 (-0.7, 0.8) | 0.0 (-0.7, 0.8) | -0.0 (-0.8, 0.8) | -0.0 (-0.8, 0.8) |
|  | Skill level 3/4 | **1.2 (0.4, 2.0)** | **1.2 (0.4, 1.9)** | **1.0 (0.3, 1.7)** | **0.9 (0.2, 1.6)** | **0.9 (0.1, 1.6)** |
| **Social support** | |  |  |  |  |  |
|  | Strong | 0.0 | 0.0 | 0.0 | 0.0 |
|  | Moderate | **-1.2 (-2.2, -0.2)** | **-1.2 (-2.1, -0.2)** | **-1.2 (-2.2, -0.2)** | **-1.2 (-2.1, -0.2)** |
|  | Poor | **-3.4 (-4.9, -1.9)** | **-3.4 (-4.9, -1.9)** | **-3.4 (-4.9, -1.9)** | **-3.4 (-4.9, -1.9)** |
| **Multimorbidity** | |  |  |  |  |
|  | No | 0.0 | 0.0 | 0.0 |
|  | Yes | 0.1 (-0.4, 0.7) | 0.1 (-0.4, 0.7) | 0.1 (-0.4, 0.7) |
| **Chronic pain** | |  |  |  |
|  | No | 0.0 | 0.0 | 0.0 |
|  | Yes | **-0.7 (-1.3, -0.1)** | **-0.7 (-1.3, -0.1)** | **-0.7 (-1.3, -0.0)** |
| **MoCA score** | |  | 0.0 (-0.1, 0.1) | 0.0 (-0.1, 0.1) |
| **Perceived vision ability** | |  |  |
|  | Poor/fair | 0.0 |
|  | Good/very good/excellent | -0.0 (-0.6, 0.6) |
| **Perceived hearing ability** | |  |
|  | Poor/fair | 0.0 |
|  | Good/very good/excellent | 0.3 (-0.2, 0.7) |
|  | |  |
| **R2 (%)** | | 7.6 | 8.7 | 11.2 | 18.7 | 19.7 | 19.9 | 20.0 |

Significant coefficients are displayed in bold.

**Appendix III cont.** Unadjusted, ‘age-and sex’-adjusted and multivariable adjusted linear regression models: health domain

| **Covariate** | | **Model 1** | **Model 2** | **Model 3** | **Model 4** | **Model 5** | **Model 6** | **Model 7** |
| --- | --- | --- | --- | --- | --- | --- | --- | --- |
| **Frailty** | |  |  |  |  |  |  |  |
|  | Robust | 0.0 | 0.0 | 0.0 | 0.0 | 0.0 | 0.0 | 0.0 |
|  | Pre-frail | **-2.3 (-2.9, -1.7)** | **-1.9 (-2.5, -1.3)** | **-1.8 (-2.4, -1.3)** | **-1.7 (-2.3, -1.2)** | **-1.5 (-2.0, -0.9)** | **-1.5 (-2.0, -0.9)** | **-1.4 (-2.0, -0.9)** |
|  | Frail | **-7.0 (-7.8, -6.3)** | **-6.3 (-7.1, -5.5)** | **-6.2 (-7.0, -5.5)** | **-6.1 (-6.9, -5.2)** | **-5.5 (-6.3, -4.6)** | **-5.4 (-6.2, -4.6)** | **-5.4 (-6.2, -4.5)** |
| **Sex** |  |  |  |  |  |  |  |  |
|  | Male | 0.0 | 0.0 | 0.0 | 0.0 | 0.0 | 0.0 |
|  | Female | **-0.9 (-1.5, -0.2)** | **-0.9 (-1.6, -0.2)** | **-0.8 (-1.5, -0.2)** | -0.4 (-1.0, 0.3) | -0.4 (-1.0, 0.3) | -0.4 (-1.0, 0.3) |
| **Age category** | |  |  |  |  |  |  |
|  | 60-64 | 0.0 | 0.0 | 0.0 | 0.0 | 0.0 | 0.0 |
|  | 65-69 | -0.5 (-1.2, 0.2) | -0.5 (-1.2, 0.2) | -0.5 (-1.2, 0.2) | -0.4 (-1.0, 0.3) | -0.3 (-1.0, 0.3) | -0.4 (-1.0, 0.3) |
|  | 70-74 | **-1.1 (-2.0, -0.2)** | **-1.1 (-2.0, -0.2)** | **-1.1 (-2.0, -0.2)** | **-0.9 (-1.7, -0.0)** | **-0.8 (-1.7, -0.0)** | **-0.8 (-1.6, -0.0)** |
|  | 75-79 | **-1.8 (-2.6, -1.1)** | **-1.9 (-2.6, -1.1)** | **-1.9 (-2.6, -1.1)** | **-1.5 (-2.3, -0.7)** | **-1.4 (-2.2, -0.6)** | **-1.4 (-2.2, -0.6)** |
|  | ≥80 | -0.9 (-2.0, 0.3) | -0.9 (-2.0, 0.2) | -1.0 (-2.2, 0.1) | -0.8 (-1.8, 0.2) | -0.7 (-1.7, 0.4) | -0.6 (-1.7, 0.4) |
| **Longest-held occupation** | |  |  |  |  |  |  |
|  | Never-employed/skill level 1 | 0.0 | 0.0 | 0.0 | 0.0 | 0.0 |
|  | Skill level 2 | -0.3 (-1.2, 0.6) | -0.4 (-1.3, 0.5) | -0.6 (-1.3, 0.2) | -0.6 (-1.4, 0.2) | -0.6 (-1.4, 0.2) |
|  | Skill level 3/4 | 0.5 (-0.4, 1.5) | 0.5 (-0.5, 1.4) | 0.0 (-0.8, 0.8) | -0.1 (-0.9, 0.8) | -0.1 (-1.0, (0.7) |
| **Social support** | |  |  |  |  |  |
|  | Strong | 0.0 | 0.0 | 0.0 | 0.0 |
|  | Moderate | -0.9 (-2.1, 0.2) | -0.7 (-1.6, 0.2) | -0.7 (-1.6, 0.2) | -0.7 (-1.6, 0.2) |
|  | Poor | -1.1 (-3.6, 1.3) | -1.0 (-3.4, 1.5) | -1.0 (-3.4, 1.5) | -0.9 (-3.3, 1.5) |
| **Multimorbidity** | |  |  |  |  |
|  | No | 0.0 | 0.0 | 0.0 |
|  | Yes | **-1.4 (-2.1, -0.7)** | **-1.4 (-2.1, -0.8)** | **-1.4 (-2.1, -0.7)** |
| **Chronic pain** | |  |  |  |
|  | No | 0.0 | 0.0 | 0.0 |
|  | Yes | **-2.1 (-2.9, -1.4)** | **-2.1 (-2.9, -1.3)** | **-2.1 (-2.9, -1.3)** |
| **MoCA score** | |  | 0.0 (-0.1, 0.1) | 0.0 (-0.1, 0.1) |
| **Perceived vision ability** | |  |  |
|  | Poor/fair | 0.0 |
|  | Good/very good/excellent | 0.2 (-0.5, 1.0) |
| **Perceived hearing ability** | |  |
|  | Poor/fair | 0.0 |
|  | Good/very good/excellent | 0.1 (-0.5, 0.6) |
|  | |  |
| **R2 (%)** | | 34.1 | 37.2 | 37.8 | 39.0 | 48.9 | 49.0 | 49.1 |

Significant coefficients are displayed in bold.

**Appendix III cont.** Unadjusted, ‘age-and sex’-adjusted and multivariable adjusted linear regression models: social relationships and participation domain

| **Covariate** | | **Model 1** | **Model 2** | **Model 3** | **Model 4** | **Model 5** | **Model 6** | **Model 7** |
| --- | --- | --- | --- | --- | --- | --- | --- | --- |
| **Frailty** | |  |  |  |  |  |  |  |
|  | Robust | 0.0 | 0.0 | 0.0 | 0.0 | 0.0 | 0.0 | 0.0 |
|  | Pre-frail | -0.1 (-0.6, 0.5) | -0.1 (-0.7, 0.5) | -0.1 (-0.6, 0.5) | 0.1 (-0.5, 0.8) | 0.2 (-0.4, 0.8) | 0.2 (-0.4, 0.8) | 0.2 (-0.4, 0.8) |
|  | Frail | -0.2 (-1.0, 0.6) | -0.3 (-1.2, 0.7) | -0.2 (-1.1, 0.7) | 0.2 (-0.6, 1.1) | 0.4 (-0.5, 1.3) | 0.4 (-0.4, 1.2) | 0.4 (-0.4, 1.2) |
| **Sex** |  |  |  |  |  |  |  |  |
|  | Male | 0.0 | 0.0 | 0.0 | 0.0 | 0.0 | 0.0 |
|  | Female | 0.2 (-0.2, 0.5) | 0.4 (-0.1, 0.9) | **0.6 (0.0, 1.1)** | **0.7 (0.2, 1.2)** | **0.7 (0.2, 1.2)** | **0.7 (0.2, 1.2)** |
| **Age category** | |  |  |  |  |  |  |
|  | 60-64 | 0.0 | 0.0 | 0.0 | 0.0 | 0.0 | 0.0 |
|  | 65-69 | 0.1 (-0.8, 1.0) | 0.1 (-0.8, 1.1) | 0.2 (-0.6, 1.1) | 0.3 (-0.5, 1.1) | 0.3 (-0.5, 1.1) | 0.3 (-0.5, 1.1) |
|  | 70-74 | 0.0 (-1.1, 1.1) | -0.0 (-1.1, 1.0) | -0.1 (-1.1, 1.0) | -0.0 (-1.1, 1.0) | -0.0 (-1.1, 1.1) | -0.0 (-1.1, 1.1) |
|  | 75-79 | -0.2 (-1.1, 0.7) | -0.2 (-1.0, 0.7) | -0.1 (-0.9, 0.7) | -0.1 (-0.9, 0.7) | -0.1 (0.9, 0.8) | -0.1 (-1.0, 0.8) |
|  | ≥80 | 0.2 (-0.8, 1.2) | 0.2 (-0.8, 1.3) | 0.0 (-0.9, 1.0) | 0.1 (-0.9, 1.1) | 0.1 (-1.0, 1.3) | 0.1 (-1.1, 1.2) |
| **Longest-held occupation** | |  |  |  |  |  |  |
|  | Never-employed/skill level 1 | 0.0 | 0.0 | 0.0 | 0.0 | 0.0 |
|  | Skill level 2 | **0.8 (0.2, 1.4)** | **0.8 (0.2, 1.4)** | **0.8 (0.2, 1.4)** | **0.8 (0.2, 1.4)** | **0.7 (0.1, 1.3)** |
|  | Skill level 3/4 | 0.5 (-0.4, 1.3) | 0.4 (-0.4, 1.2) | 0.2 (-0.6, 1.1) | 0.2 (-0.6, 1.0) | 0.2 (-0.6, 1.1) |
| **Social support** | |  |  |  |  |  |
|  | Strong | 0.0 | 0.0 | 0.0 | 0.0 |
|  | Moderate | **-1.5 (-2.4, -0.7)** | **-1.5 (-2.3, -0.6)** | **-1.5 (-2.3, -0.6)** | **-1.5 (-2.3, -0.7)** |
|  | Poor | **-2.7 (-4.4, -1.1)** | **-2.7 (-4.3, -1.1)** | **-2.7 (-4.3, -1.1)** | **-2.8 (-4.4, -1.1)** |
| **Multimorbidity** | |  |  |  |  |
|  | No | 0.0 | 0.0 | 0.0 |
|  | Yes | -0.3 (-0.8, 0.3) | -0.3 (-0.8, 0.2) | -0.3 (-0.8, 0.2) |
| **Chronic pain** | |  |  |  |
|  | No | 0.0 | 0.0 | 0.0 |
|  | Yes | -0.5 (-1.0, 0.1) | -0.5 (-1.0, 0.1) | -0.5 (-1.1, 0.1) |
| **MoCA score** | |  | 0.0 (-0.1, 0.1) | 0.0 (-0.1, 0.1) |
| **Perceived vision ability** | |  |  |
|  | Poor/fair | 0.0 |
|  | Good/very good/excellent | -0.1 (-0.8, 0.6) |
| **Perceived hearing ability** | |  |
|  | Poor/fair | 0.0 |
|  | Good/very good/excellent | -0.2 (-0.8, 0.4) |
|  | |  |
| **R2 (%)** | | 0.1 | 0.3 | 1.9 | 8.9 | 9.6 | 9.7 | 9.9 |

Significant coefficients are displayed in bold.

**Appendix III cont.** Unadjusted, ‘age-and sex’-adjusted and multivariable adjusted linear regression models: independence, control over life and freedom domain

| **Covariate** | | **Model 1** | **Model 2** | **Model 3** | **Model 4** | **Model 5** | **Model 6** | **Model 7** |
| --- | --- | --- | --- | --- | --- | --- | --- | --- |
| **Frailty** | |  |  |  |  |  |  |  |
|  | Robust | 0.0 | 0.0 | 0.0 | 0.0 | 0.0 | 0.0 | 0.0 |
|  | Pre-frail | **-1.3 (-1.8, -0.9)** | **-1.1 (-1.6, -0.6)** | **-1.0 (-1.5, -0.6)** | **-0.9 (-1.4, -0.5)** | **-0.8 (-1.3, -0.4)** | **-0.7 (-1.2, -0.2)** | **-0.6 (-1.2, -0.1)** |
|  | Frail | **-4.4 (-5.0, -3.7)** | **-3.9 (-4.7, -3.2)** | **-3.7 (-4.5, -2.9)** | **-3.6 (-4.3, -2.8)** | **-3.3 (-4.1, -2.6)** | **-3.0 (-3.8, -2.2)** | **-2.9 (-3.7, -2.1)** |
| **Sex** |  |  |  |  |  |  |  |  |
|  | Male | 0.0 | 0.0 | 0.0 | 0.0 | 0.0 | 0.0 |
|  | Female | **-0.5 (-1.0, -0.1)** | -0.4 (-0.8, 0.1) | -0.3 (-0.8, 0.2) | -0.1 (-0.6, 0.3) | -0.1 (-0.5, 0.4) | -0.1 (-0.5, 0.4) |
| **Age category** | |  |  |  |  |  |  |
|  | 60-64 | 0.0 | 0.0 | 0.0 | 0.0 | 0.0 | 0.0 |
|  | 65-69 | -0.2 (-0.8, 0.3) | -0.2 (-0.7, 0.3) | -0.2 (-0.6, 0.3) | -0.2 (-0.6, 0.3) | -0.1 (-0.6, 0.3) | -0.2 (-0.6, 0.3) |
|  | 70-74 | -0.7 (-1.5, 0.1) | -0.7 (-1.4, 0.1) | -0.7 (-1.4, 0.0) | -0.7 (-1.4, 0.1) | -0.5 (-1.2, 0.2) | -0.5 (-1.2, 0.2) |
|  | 75-79 | **-0.8 (-1.5, -0.2)** | **-0.9 (-1.6, -0.2)** | **-0.9 (-1.5, -0.2)** | **-0.7 (-1.3, -0.1)** | -0.6 (-1.2, 0.1) | -0.5 (-1.1, 0.1) |
|  | ≥80 | -0.7 (-1.5, 0.0) | **-0.8 (-1.6, -0.1)** | **-0.9 (-1.7, -0.1)** | **-0.8 (-1.6, -0.1)** | -0.2 (-1.0, 0.5) | -0.2 (-0.9, 0.5) |
| **Longest-held occupation** | |  |  |  |  |  |  |
|  | Never-employed/skill level 1 | 0.0 | 0.0 | 0.0 | 0.0 | 0.0 |
|  | Skill level 2 | 0.2 (-0.5, 1.0) | 0.2 (-0.5, 0.9) | 0.1 (-0.6, 0.8) | -0.0 (-0.6, 0.6) | -0.0 (-0.6, 0.6) |
|  | Skill level 3/4 | **1.3 (0.6, 2.0)** | **1.2 (0.5, 1.9)** | **1.0 (0.4, 1.7)** | 0.5 (-0.1, 1.1) | 0.4 (-0.2, 1.0) |
| **Social support** | |  |  |  |  |  |
|  | Strong | 0.0 | 0.0 | 0.0 | 0.0 |
|  | Moderate | **-0.9 (-1.5, -0.4)** | **-0.9 (-1.4, -0.3)** | **-0.9 (-1.5, -0.4)** | **-0.9 (-1.4, -0.4)** |
|  | Poor | -1.0 (-2.2, 0.1) | -1.0 (-2.2, 0.2) | -0.9 (-2.2, 0.3) | -0.8 (-2.1, 0.4) |
| **Multimorbidity** | |  |  |  |  |
|  | No | 0.0 | 0.0 | 0.0 |
|  | Yes | -0.1 (-0.5, 0.3) | -0.1 (-0.5, 0.2) | -0.1 (-0.5, 0.3) |
| **Chronic pain** | |  |  |  |
|  | No | 0.0 | 0.0 | 0.0 |
|  | Yes | **-0.8 (-1.3, -0.3)** | **-0.7 (-1.1, -0.3)** | -0.7 (-1.1, -0.3) |
| **MoCA score** | |  | **0.1 (0.1, 0.2)** | **0.1 (0.1, 0.2)** |
| **Perceived vision ability** | |  |  |
|  | Poor/fair | 0.0 |
|  | Good/very good/excellent | 0.4 (-0.2, 1.0) |
| **Perceived hearing ability** | |  |
|  | Poor/fair | 0.0 |
|  | Good/very good/excellent | 0.1 (-0.4, 0.5) |
| **R2 (%)** | | 28.2 | 30.4 | 33.1 | 35.1 | 36.6 | 39.5 | 40.1 |

Significant coefficients are displayed in bold.

**Appendix III cont.** Unadjusted, ‘age-and sex’-adjusted and multivariable adjusted linear regression models: home and neighbourhood domain

| **Covariate** | | **Model 1** | **Model 2** | **Model 3** | **Model 4** | **Model 5** | **Model 6** | **Model 7** |
| --- | --- | --- | --- | --- | --- | --- | --- | --- |
| **Frailty** | |  |  |  |  |  |  |  |
|  | Robust | 0.0 | 0.0 | 0.0 | 0.0 | 0.0 | 0.0 | 0.0 |
|  | Pre-frail | -0.3 (-0.8, 0.2) | -0.3 (-0.8, 0.2) | -0.3 (-0.8, 0.2) | -0.1 (-0.7, 0.4) | -0.1 (-0.7, 0.5) | -0.0 (-0.6, 0.5) | -0.0 (-0.6, 0.5) |
|  | Frail | -0.6 (-1.2, 0.1) | **-0.8 (-1.6, -0.0)** | -0.7 (-1.5, 0.1) | -0.4 (-1.1, 0.3) | -0.4 (-1.1, 0.3) | -0.2 (-0.9, 0.5) | -0.2 (-0.9, 0.5) |
| **Sex** |  |  |  |  |  |  |  |  |
|  | Male | 0.0 | 0.0 | 0.0 | 0.0 | 0.0 | 0.0 |
|  | Female | -0.1 (-0.5, 0.3) | -0.0 (-0.5, 0.4) | 0.1 (-0.3, 0.5) | 0.1 (-0.3, 0.5) | 0.2 (-0.2, 0.6) | 0.2 (-0.3, 0.6) |
| **Age category** | |  |  |  |  |  |  |
|  | 60-64 | 0.0 | 0.0 | 0.0 | 0.0 | 0.0 | 0.0 |
|  | 65-69 | -0.1 (-0.6, 0.4) | -0.1 (-0.6, 0.4) | -0.1 (-0.5, 0.4) | -0.0 (-0.5, 0.5) | -0.0 (-0.5, 0.5) | -0.0 (-0.5, 0.5) |
|  | 70-74 | -0.1 (-0.7, 0.5) | -0.1 (-0.7, 0.5) | -0.1 (-0.7, 0.5) | -0.1 (-0.8, 0.5) | -0.0 (-0.7, 0.6) | -0.0 (-0.7, 0.7) |
|  | 75-79 | 0.1 (-0.6, 0.8) | 0.1 (-0.6, 0.8) | 0.1 (-0.6, 0.8) | 0.2 (-0.6, 0.9) | 0.2 (-0.5, 1.0) | 0.3 (-0.6, 1.1) |
|  | ≥80 | 0.7 (0.0, 1.4) | 0.7 (-0.0, 1.3) | 0.5 (-0.2, 1.2) | 0.6 (-0.1, 1.3) | 0.9 (0.2, 1.6) | 0.9 (0.1, 1.7) |
| **Longest-held occupation** | |  |  |  |  |  |  |
|  | Never-employed/skill level 1 | 0.0 | 0.0 | 0.0 | 0.0 | 0.0 |
|  | Skill level 2 | 0.0 (-0.5, 0.5) | -0.0 (-0.5, 0.5) | -0.0 (-0.5, 0.5) | -0.1 (-0.6, 0.4) | -0.1 (-0.6, 0.4) |
|  | Skill level 3/4 | 0.6 (-0.0, 1.2) | 0.5 (-0.1, 1.2) | 0.4 (-0.2, 1.1) | 0.1 (-0.5, 0.8) | 0.1 (-0.5, 0.8) |
| **Social support** | |  |  |  |  |  |
|  | Strong | 0.0 | 0.0 | 0.0 | 0.0 |
|  | Moderate | **-1.0 (-1.6, -0.4)** | **-1.0 (-1.6, -0.5)** | **-1.1 (-1.6, -0.5)** | **-1.1 (-1.6, -0.5)** |
|  | Poor | **-2.2 (-3.7, -0.8)** | **-2.2 (-3.7, -0.8)** | **-2.2 (-3.7, -0.7)** | **-2.2 (-3.6, -0.7)** |
| **Multimorbidity** | |  |  |  |  |
|  | No | 0.0 | 0.0 | 0.0 |
|  | Yes | 0.2 (-0.2, 0.6) | 0.2 (-0.2, 0.6) | 0.2 (-0.2, 0.6) |
| **Chronic pain** | |  |  |  |
|  | No | 0.0 | 0.0 | 0.0 |
|  | Yes | **-0.4 (-0.8, -0.1)** | -0.4 (-0.8, 0.0) | -0.4 (-0.8, 0.0) |
| **MoCA score** | |  | **0.1 (0.0, 0.1)** | **0.1 (0.0, 0.1)** |
| **Perceived vision ability** | |  |  |
|  | Poor/fair | 0.0 |
|  | Good/very good/excellent | 0.1 (-0.3, 0.4) |
| **Perceived hearing ability** | |  |
|  | Poor/fair | 0.0 |
|  | Good/very good/excellent | 0.1 (-0.5, 0.6) |
|  | |  |
| **R2 (%)** | | 0.7 | 1.7 | 2.6 | 8.6 | 9.6 | 10.9 | 10.9 |

Significant coefficients are displayed in bold.

**Appendix III cont.** Unadjusted, ‘age-and sex’-adjusted and multivariable adjusted linear regression models: psychological and emotional wellbeing domain

| **Covariate** | | **Model 1** | **Model 2** | **Model 3** | **Model 4** | **Model 5** | **Model 6** | **Model 7** |
| --- | --- | --- | --- | --- | --- | --- | --- | --- |
| **Frailty** | |  |  |  |  |  |  |  |
|  | Robust | 0.0 | 0.0 | 0.0 | 0.0 | 0.0 | 0.0 | 0.0 |
|  | Pre-frail | **-0.5 (-0.9, -0.0)** | **-0.5 (-0.9, -0.0)** | -0.4 (-0.9, 0.0) | -0.3 (-0.8, 0.1) | -0.3 (-0.7, 0.2) | -0.2 (-0.6, 0.3) | -0.2 (-0.6, 0.3) |
|  | Frail | **-1.5 (-1.9, -1.0)** | **-1.6 (-2.2, -1.1)** | **-1.5 (-2.0, -0.9)** | **-1.3 (-1.9, -0.8)** | **-1.2 (-1.8, -0.6)** | **-1.0 (-1.6, -0.4)** | **-1.0 (-1.6, -0.4)** |
| **Sex** |  |  |  |  |  |  |  |  |
|  | Male | 0.0 | 0.0 | 0.0 | 0.0 | 0.0 | 0.0 |
|  | Female | **-0.4 (-0.8, -0.0)** | -0.3 (-0.7, 0.2) | -0.2 (-0.6, 0.2) | -0.1 (-0.5, 0.3) | -0.0 (-0.4, 0.4) | -0.0 (-0.4, 0.4) |
| **Age category** | |  |  |  |  |  |  |
|  | 60-64 | 0.0 | 0.0 | 0.0 | 0.0 | 0.0 | 0.0 |
|  | 65-69 | 0.1 (-0.4, 0.5) | 0.1 (-0.4, 0.5) | 0.1 (-0.3, 0.6) | 0.1 (-0.3, 0.6) | 0.2 (-0.3, 0.6) | 0.2 (-0.3, 0.6) |
|  | 70-74 | -0.1 (-0.8, 0.5) | -0.1 (-0.8, 0.5) | -0.2 (-0.7, 0.4) | -0.2 (-0.8, 0.4) | -0.1 (-0.6, 0.5) | -0.1 (-0.6, 0.5) |
|  | 75-79 | 0.3 (-0.2, 0.9) | 0.3 (-0.3, 0.8) | 0.3 (-0.2, 0.8) | 0.3 (-0.2, 0.9) | 0.4 (-0.1, 1.0) | 0.4 (-0.1, 1.0) |
|  | ≥80 | 0.6 (-0.1, 1.2) | 0.5 (-0.1, 1.2) | 0.5 (-0.2, 1.1) | 0.5 (-0.1, 1.2) | **0.9 (0.1, 1.6)** | **0.9 (0.1, 1.6)** |
| **Longest-held occupation** | |  |  |  |  |  |  |
|  | Never-employed/skill level 1 | 0.0 | 0.0 | 0.0 | 0.0 | 0.0 |
|  | Skill level 2 | 0.2 (-0.1, 0.6) | 0.2 (-0.2, 0.6) | 0.2 (-0.2, 0.6) | 0.1 (-0.3, 0.5) | 0.1 (-0.3, 0.5) |
|  | Skill level 3/4 | 0.9 (0.3, 1.4) | **0.8 (0.3, 1.4)** | 0.7 (0.1, 1.3) | 0.4 (-0.2, 0.9) | 0.3 (-0.2, 0.9) |
| **Social support** | |  |  |  |  |  |
|  | Strong | 0.0 | 0.0 | 0.0 | 0.0 |
|  | Moderate | **-0.7 (-1.2, -0.2)** | **-0.7 (-1.2, -0.2)** | **-0.7 (-1.2, -0.2)** | **-0.7 (-1.2, -0.2)** |
|  | Poor | -0.9 (-2.2, 0.4) | -0.8 (-2.1, 0.4) | -0.8 (-2.1, 0.5) | -0.8 (-2.0, 0.5) |
| **Multimorbidity** | |  |  |  |  |
|  | No | 0.0 | 0.0 | 0.0 |
|  | Yes | 0.0 (-0.3, 0.4) | 0.0 (-0.3, 0.3) | 0.0 (-0.3, 0.3) |
| **Chronic pain** | |  |  |  |
|  | No | 0.0 | 0.0 | 0.0 |
|  | Yes | **-0.5 (-0.9, -0.2)** | **-0.5 (-0.8, -0.1)** | **-0.5 (-0.8, -0.1)** |
| **MoCA score** | |  | **0.1 (0.0, 0.1)** | **0.1 (0.0, 0.1)** |
| **Perceived vision ability** | |  |  |
|  | Poor/fair | 0.0 |
|  | Good/very good/excellent | 0.2 (-0.2, 0.6) |
| **Perceived hearing ability** | |  |
|  | Poor/fair | 0.0 |
|  | Good/very good/excellent | -0.1 (-0.5, 0.4) |
|  | |  |
| **R2 (%)** | | 5.2 | 6.9 | 8.9 | 11.0 | 12.1 | 14.1 | 14.3 |

Significant coefficients are displayed in bold.

**Appendix III cont.** Unadjusted, ‘age-and sex’-adjusted and multivariable adjusted linear regression models: financial circumstances domain

| **Covariate** | | **Model 1** | **Model 2** | **Model 3** | **Model 4** | **Model 5** | **Model 6** | **Model 7** |
| --- | --- | --- | --- | --- | --- | --- | --- | --- |
| **Frailty** | |  |  |  |  |  |  |  |
|  | Robust | 0.0 | 0.0 | 0.0 | 0.0 | 0.0 | 0.0 | 0.0 |
|  | Pre-frail | **-1.4 (-2.1, -0.7)** | **-1.5 (-2.1, -0.9)** | **-1.3 (-1.9, -0.7)** | **-1.1 (-1.8, -0.4)** | **-1.0 (-1.7, -0.3)** | **-0.9 (-1.6, -0.2)** | **-0.8 (-1.5, -0.1)** |
|  | Frail | **-2.2 (-3.1, -1.2)** | **-2.6 (-3.5, -1.7)** | **-2.0 (-3.1, -1.0)** | **-1.6 (-2.5, -0.6)** | **-1.4 (-2.4, -0.4)** | **-1.1 (-2.1,-0.1)** | -1.0 (-2.0, 0.0) |
| **Sex** |  |  |  |  |  |  |  |  |
|  | Male | 0.0 | 0.0 | 0.0 | 0.0 | 0.0 | 0.0 |
|  | Female | -0.2 (-1.0, 0.5) | 0.1 (-0.8, 1.0) | 0.4 (-0.4, 1.2) | 0.5 (-0.3, 1.2) | 0.5 (-0.2, 1.3) | 0.5 (-0.2, 1.3) |
| **Age category** | |  |  |  |  |  |  |
|  | 60-64 | 0.0 | 0.0 | 0.0 | 0.0 | 0.0 | 0.0 |
|  | 65-69 | 0.4 (-0.5, 1.4) | 0.5 (-0.4, 1.3) | 0.6 (-0.1, 1.3) | 0.5 (-0.2, 1.3) | 0.5 (-0.2, 1.3) | 0.5 (-0.2, 1.3) |
|  | 70-74 | 0.3 (-1.2, 1.7) | 0.3 (-1.0, 1.6) | 0.3 (-1.0, 1.5) | 0.2 (-1.1, 1.5) | 0.4 (-0.8, 1.6) | 0.4 (-0.7, 1.5) |
|  | 75-79 | 0.5 (-0.5, 1.6) | 0.4 (-0.6, 1.3) | 0.4 (-0.6, 1.5) | 0.4 (-0.7, 1.5) | 0.5 (-0.5, 1.6) | 0.6 (-0.5, 1.7) |
|  | ≥80 | 1.1 (-0.0, 2.3) | 1.0 (-0.1, 2.0) | 0.7 (-0.4, 1.9) | 0.7 (-0.5, 2.0) | **1.3 (0.1, 2.5)** | **1.3 (0.2, 2.6)** |
| **Longest-held occupation** | |  |  |  |  |  |  |
|  | Never-employed/skill level 1 | 0.0 | 0.0 | 0.0 | 0.0 | 0.0 |
|  | Skill level 2 | 0.4 (-0.4, 1.1) | 0.4 (-0.3, 1.1) | 0.3 (-0.4, 1.0) | 0.2 (-0.5, 0.9) | 0.2 (-0.5, 0.9) |
|  | Skill level 3/4 | **2.9 (1.8, 4.0)** | **2.8 (1.6, 3.9)** | **2.7 (1.6, 3.9)** | **2.2 (1.0, 3.4)** | **2.0 (0.8, 3.2)** |
| **Social support** | |  |  |  |  |  |
|  | Strong | 0.0 | 0.0 | 0.0 | 0.0 |
|  | Moderate | **-2.2 (-2.9, -1.5)** | **-2.2 (-2.9, -1.4)** | **-2.2 (-2.9, -1.5)** | **-2.2 (-2.8, -1.5)** |
|  | Poor | **-3.4 (-5.3, -1.6)** | **-3.4 (-5.3, -1.5)** | **-3.3 (-5.1, -1.5)** | **-3.1 (-4.9, -1.4)** |
| **Multimorbidity** | |  |  |  |  |
|  | No | 0.0 | 0.0 | 0.0 |
|  | Yes | 0.3 (-0.5, 1.0) | 0.2 (-0.5, 1.0) | 0.3 (-0.5, 1.0) |
| **Chronic pain** | |  |  |  |
|  | No | 0.0 | 0.0 | 0.0 |
|  | Yes | -0.5 (-1.0, 0.0) | -0.4 (-1.0, 0.1) | -0.4 (-0.9, 0.1) |
| **MoCA score** | |  | **0.1 (0.1, 0.2)** | **0.1 (0.0, 0.2)** |
| **Perceived vision ability** | |  |  |
|  | Poor/fair | 0.0 |
|  | Good/very good/excellent | **0.8 (0.0, 1.6)** |
| **Perceived hearing ability** | |  |
|  | Poor/fair | 0.0 |
|  | Good/very good/excellent | 0.0 (-0.7, 0.7) |
|  | |  |
| **R2 (%)** | | 5.1 | 5.9 | 14.0 | 21.8 | 22.3 | 24.1 | 25.2 |

Significant coefficients are displayed in bold.

**Appendix III cont.** Unadjusted, ‘age-and sex’-adjusted and multivariable adjusted linear regression models: leisure activities and religion wellbeing domain

| **Covariate** | | **Model 1** | **Model 2** | **Model 3** | **Model 4** | **Model 5** | **Model 6** | **Model 7** |
| --- | --- | --- | --- | --- | --- | --- | --- | --- |
| **Frailty** | |  |  |  |  |  |  |  |
|  | Robust | 0.0 | 0.0 | 0.0 | 0.0 | 0.0 | 0.0 | 0.0 |
|  | Pre-frail | **-0.5 (-1.0, -0.1)** | **-0.5 (-1.0, -0.1)** | **-0.4 (-0.9, -0.0)** | -0.4 (-0.8, 0.0) | -0.3 (-0.7, 0.1) | -0.2 (-0.6, 0.3) | -0.2 (-0.6, 0.3) |
|  | Frail | **-1.8 (-2.7, -1.0)** | **-1.9 (-2.7, -1.0)** | **-1.6 (-2.4, -0.8)** | **-1.5 (-2.4, -0.7)** | **-1.4 (-2.2, -0.6)** | **-1.1 (-2.0, -0.2)** | **-1.1 (-2.0, -0.2)** |
| **Sex** |  |  |  |  |  |  |  |  |
|  | Male | 0.0 | 0.0 | 0.0 | 0.0 | 0.0 | 0.0 |
|  | Female | -0.2 (-0.6, 0.3) | 0.0 (-0.6, 0.7) | 0.1 (-0.6, 0.7) | 0.1 (-0.5, 0.7) | 0.2 (-0.4, 0.8) | 0.2 (-0.4, 0.8) |
| **Age category** | |  |  |  |  |  |  |
|  | 60-64 | 0.0 | 0.0 | 0.0 | 0.0 | 0.0 | 0.0 |
|  | 65-69 | 0.1 (-0.6, 0.8) | 0.1 (-0.5, 0.8) | 0.1 (-0.5, 0.8) | 0.1 (-0.4, 0.7) | 0.2 (-0.4, 0.8) | 0.2 (-0.4, 0.8) |
|  | 70-74 | -0.2 (-1.1, 0.6) | -0.2 (-1.0, 0.6) | -0.2 (-1.1, 0.6) | -0.2 (-1.1, 0.6) | -0.1 (-0.9, 0.8) | -0.1 (-0.9, 0.8) |
|  | 75-79 | 0.1 (-0.6, 0.8) | 0.1 (-0.7, 0.8) | 0.1 (-0.7, 0.8) | 0.1 (-0.6, 0.9) | 0.3 (-0.6, 1.1) | 0.2 (-0.6, 1.1) |
|  | ≥80 | 0.2 (-0.6, 0.9) | 0.1 (-0.6, 0.8) | 0.1 (-0.7, 0.8) | 0.1 (-0.6, 0.8) | 0.6 (-0.2, 1.4) | 0.6 (-0.3, 1.5) |
| **Longest-held occupation** | |  |  |  |  |  |  |
|  | Never-employed/skill level 1 | 0.0 | 0.0 | 0.0 | 0.0 | 0.0 |
|  | Skill level 2 | 0.4 (-0.3, 1.1) | 0.4 (-0.3, 1.2) | 0.4 (-0.4, 1.1) | 0.3 (-0.5, 1.0) | 0.3 (-0.5, 1.0) |
|  | Skill level 3/4 | **1.3 (0.6, 2.1)** | **1.3 (0.5, 2.1)** | 1.2 (0.4, 2.1) | 0.8 (-0.1, 1.6) | 0.7 (-0.1, 1.6) |
| **Social support** | |  |  |  |  |  |
|  | Strong | 0.0 | 0.0 | 0.0 | 0.0 |
|  | Moderate | -0.3 (-0.9, 0.4) | -0.3 (-0.9, 0.4) | -0.3 (-0.9, 0.3) | -0.3 (-0.9, 0.3) |
|  | Poor | -0.3 (-1.3, 0.7) | -0.3 (-1.3, 0.7) | -0.2 (-1.3, 0.8) | -0.2 (-1.2, 0.8) |
| **Multimorbidity** | |  |  |  |  |
|  | No | 0.0 | 0.0 | 0.0 |
|  | Yes | -0.2 (-0.8, 0.4) | -0.2 (-0.8, 0.4) | -0.2 (-0.9, 0.4) |
| **Chronic pain** | |  |  |  |
|  | No | 0.0 | 0.0 | 0.0 |
|  | Yes | -0.3 (-0.9, 0.4) | -0.2 (-0.8, 0.4) | -0.2 (-0.8, 0.4) |
| **MoCA score** | |  | **0.1 (0.0, 0.2)** | **0.1 (0.0, 0.2)** |
| **Perceived vision ability** | |  |  |
|  | Poor/fair | 0.0 |
|  | Good/very good/excellent | 0.1 (-0.6, 0.8) |
| **Perceived hearing ability** | |  |
|  | Poor/fair | 0.0 |
|  | Good/very good/excellent | -0.1 (-0.6, 0.4) |
|  | |  |
| **R2 (%)** | | 4.8 | 5.0 | 7.8 | 8.1 | 8.2 | 10.5 | 10.6 |

Significant coefficients are displayed in bold.
